# Supplementary material
Source: Elsevier journal article supplement (https://www.sciencedirect.com/science/article/pii/S157821901730313X)
Supplement: mmc1 [file S157821901730313X:mmc1.doc]

1. Supplementary data

The additional material for this article can be accessed with its electronic version available at: <doi:10.1016/j.ad.2017.05.013>.

1. [{(Appendix A)}] Supplementary data

mmc1
